# Supplementary material for: Tissue tropism and transmission ecology predict virulence of human RNA viruses
Source: PLoS Biol. 2019 Nov 26;17(11):e3000206. doi: 10.1371/journal.pbio.3000206 (PMC6879112; doi:10.1371/journal.pbio.3000206)
Supplement: S3 Table — Predictive performance metrics of random forest models applied to data subsets, excluding viruses with low-certainty data (n denotes number of viruses excluded). Diagnostics indicate mean values across 200 training/test partitions sampled separately for each data subset. Otherwise, random forest methodology follows that of Materials and Methods. Supporting data are available via figshare: 10.6084/m9.figshare.7406441.v3 (https://figshare.com/articles/Data_and_supporting_R_script_for_Tissue_Tropism_and_Transmission_Ecology_Predict_Virulence_of_Human_RNA_Viruses/7406441/3). (CSV) [file pbio.3000206.s003.csv]

Data subset	Raw prevalence (severe)	Null accuracy	Accuracy (95% CI)	Sensitivity	Specificity	NPV	TSS	AUC
Excluding viruses only known to infect humans from serological evidence (n = 36)	0.348	0.652	0.862 (0.682, 0.953)	0.778	0.907	0.887	0.684	0.953
Excluding viruses with < 20 recognised human infections (n = 55)	0.211	0.789	0.871 (0.692, 0.958)	0.686	0.92	0.92	0.606	0.948
Excluding viruses with poor data quality in at least one predictor (n = 71)	0.389	0.611	0.863 (0.683, 0.954)	0.798	0.905	0.882	0.703	0.965
