# Supplementary material for: Tissue tropism and transmission ecology predict virulence of human RNA viruses
Source: PLOS journal article supplement (doi:10.1371/journal.pbio.3000206), 2019-11-26
Supplement: S4 (10.1371/journal.pbio.3000206.s004) [file journal.pbio.3000206.s004]

| Rank | Definition                                                                                                                                                                                                                                      | Example virus species       | No. virus species |
|------|-------------------------------------------------------------------------------------------------------------------------------------------------------------------------------------------------------------------------------------------------|-----------------------------|-------------------|
| 1    | Fits any of 'severe' criteria outlined in main text ( $\geq 5\%$ case fatality ratio, frequent reports of hospitalisation, significant morbidity from certain symptoms, otherwise explicitly described as "severe" or causing "severe disease") | <i>Rabies virus</i>         | 58                |
| 2    | Those not fitting 'severe' criteria, but are reported to have caused fatalities in healthy adults                                                                                                                                               | <i>Dengue virus</i>         | 14                |
| 3    | Those not fitting 'severe' criteria, but have severe strains or subspecies reported to cause fatalities in healthy adults                                                                                                                       | <i>Influenza A virus</i>    | 6                 |
| 4    | Those not fitting 'severe' criteria, but are reported to have caused fatalities in vulnerable individuals (age 16 and below or 60 and above, immunosuppressed, having co-morbidities, or otherwise 'at-risk')                                   | <i>Rotavirus A</i>          | 17                |
| 5    | Those not fitting 'severe' criteria, but have severe strains or subspecies reported to cause fatalities in vulnerable individuals                                                                                                               | <i>Parechovirus A</i>       | 3                 |
| 6    | Those not fitting 'severe' criteria that have never been reported to cause fatalities                                                                                                                                                           | <i>Human respirovirus 1</i> | 114               |
